# Supplementary material
Source: Springer Nature journal article supplement (https://www.springermedizin.de/resource/supplementary/12974_2011_379_MOESM7_ESM.pdf/9601552)

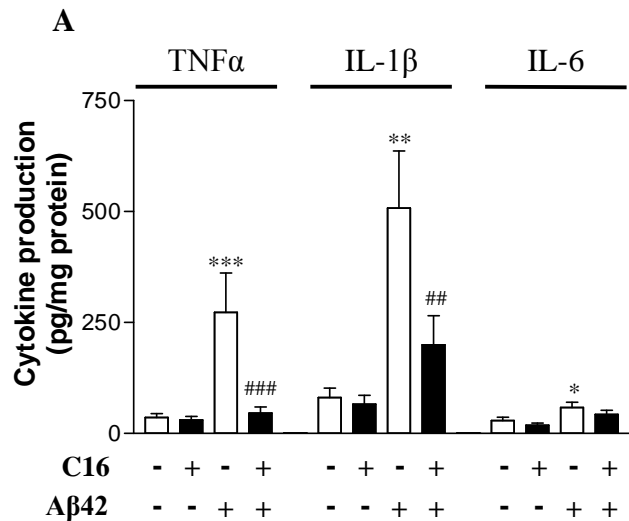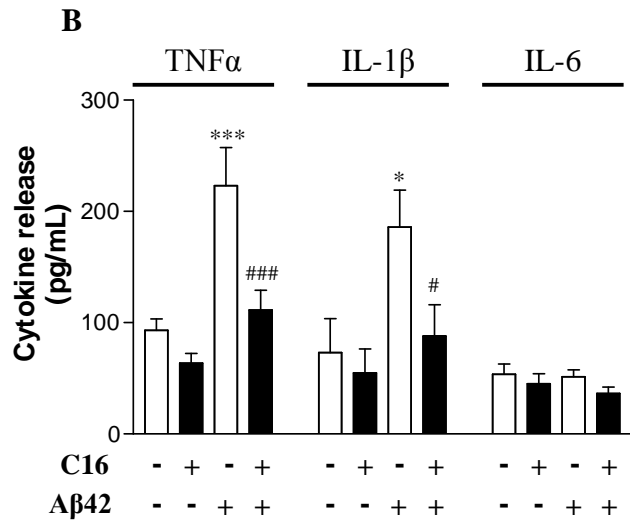

Supplement: MOESM7 [file 9601552]
